# Supplementary material
Source: PubMed Central journal article supplement (PMC8634074)
Supplement: mmc1.pdf [file mmc1.pdf]

## Supplementary material

### Model specification

Let  $Y_{ij}$  denote the binary indicator which is one when participant  $i$  in wave  $j$  is willing to accept the vaccine and zero otherwise.

The multivariate analysis models estimates the probability to accept the vaccine with a generalized additive model (GAM), which is specified as

$$\text{logit} \left( P(Y_{ij} = 1) \right) = \alpha_j + \boldsymbol{\beta}_j \cdot \mathbf{x}_{ij} + f_j(\text{lon}_{ij}, \text{lat}_{ij}),$$

where  $\boldsymbol{\alpha}$  is a vector of wave specific parameters,  $\mathbf{x}_{ij}$  is the observed covariate vector for participant  $i$  in wave  $j$  with associated parameter vector  $\boldsymbol{\beta}_j$  and  $f_j$  is a smooth two-dimensional function capturing the effect of longitude and latitude in wave  $j$ .

In this model every parameter interacts with time via the wave indicator  $j$ . Starting from the full model, covariates and parameter interactions were selected via backward selection via the Bayesian information criterion (BIC) to arrive at the final model.

For the multivariate analyses in Table 2, we model the vaccine acceptance probability with a generalized linear model (GLM) against a single behaviour related covariate and the basic confounders (time, age, gender and education), i.e.

$$\text{logit} \left( P(Y_{ij} = 1) \right) = \boldsymbol{\gamma} \cdot \mathbf{b}_{ij} + \boldsymbol{\beta} \cdot \mathbf{z}_{ij},$$

where  $\mathbf{b}_{ij}$  is an indicator vector containing the observed response of participant  $i$  in wave  $j$  on the behaviour related question,  $\boldsymbol{\gamma}$  is the associated parameter vector and  $\boldsymbol{\beta} \cdot \mathbf{z}_{ij}$  is the estimated effect for the confounding variables.

## Full model specification behaviour related outcomes

**Table S.1: Association installation Coronalert app and vaccine willingness.**

|                                    | participants (%) | vaccine willingness %<br>unweighted/weighted | vaccine willingness OR (95% CI) |
|------------------------------------|------------------|----------------------------------------------|---------------------------------|
| <b>Participation date</b>          |                  |                                              |                                 |
| November 03                        | 22,953 (33.9)    | 81.8/83.1                                    | REF                             |
| November 17                        | 23,902 (35.3)    | 82.1/83.1                                    | 1.00 (0.95-1.05)                |
| December 01                        | 20,813 (30.8)    | 81.0/81.7                                    | 0.88 (0.84-0.93)                |
| <b>Age</b>                         |                  |                                              |                                 |
| 18-30                              | 6,455 (9.5)      | 77.4/79.2                                    | REF                             |
| 31-50                              | 21,574 (31.9)    | 75.8/77.2                                    | 0.92 (0.87-0.97)                |
| 51-70                              | 34,248 (50.6)    | 84.6/85.7                                    | 2.00 (1.88-2.13)                |
| 71+                                | 5,391 (8.0)      | 91.3/90.9                                    | 3.85 (3.55-4.17)                |
| <b>Gender</b>                      |                  |                                              |                                 |
| Female                             | 46,057 (68.1)    | 78.8/79.3                                    | REF                             |
| Male                               | 21,611 (31.9)    | 87.8/86.1                                    | 1.69 (1.62-1.76)                |
| <b>Educational attainment</b>      |                  |                                              |                                 |
| Primary education                  | 815 (1.2)        | 76.4/76.2                                    | 0.45 (0.38-0.53)                |
| Secondary education                | 18,238 (27.0)    | 78.1/78.8                                    | 0.61 (0.58-0.64)                |
| Higher education                   | 46,453 (68.6)    | 82.7/83.6                                    | REF                             |
| PhD                                | 2,162 (3.2)      | 90.5/90.9                                    | 1.96 (1.71-2.24)                |
| <b>Installation Coronalert app</b> |                  |                                              |                                 |
| Installed                          | 41,057 (60.7)    | 87.7/88.6                                    | REF                             |
| Not installed                      | 26,611 (39.3)    | 72.4/73.2                                    | 0.33 (0.32-0.35)                |

**Table S.2: Association physical contact outside household and vaccine willingness.**

|                                                     | participants (%) | vaccine willingness %<br>unweighted/weighted | vaccine willingness OR (95% CI) |
|-----------------------------------------------------|------------------|----------------------------------------------|---------------------------------|
| <b>Participation date</b>                           |                  |                                              |                                 |
| July 14                                             | 24,756 (10.7)    | 89.2/89.9                                    | REF                             |
| July 28                                             | 32,219 (13.9)    | 89.3/90.0                                    | 1.00 (0.94-1.06)                |
| August 25                                           | 22,788 (9.9)     | 80.7/82.6                                    | 0.50 (0.48-0.53)                |
| September 08                                        | 20,490 (8.9)     | 78.1/80.7                                    | 0.43 (0.41-0.46)                |
| September 22                                        | 17,722 (7.7)     | 77.7/80.2                                    | 0.43 (0.41-0.45)                |
| November 03                                         | 22,953 (9.9)     | 81.8/83.1                                    | 0.50 (0.47-0.53)                |
| November 17                                         | 23,902 (10.3)    | 82.1/83.1                                    | 0.51 (0.48-0.53)                |
| December 01                                         | 20,813 (9.0)     | 81.0/81.7                                    | 0.46 (0.44-0.49)                |
| December 15                                         | 19,953 (8.6)     | 83.1/83.9                                    | 0.54 (0.51-0.57)                |
| December 29                                         | 25,383 (11.0)    | 85.1/85.9                                    | 0.64 (0.61-0.68)                |
| <b>Age</b>                                          |                  |                                              |                                 |
| 18-30                                               | 21,762 (9.4)     | 81.7/82.4                                    | REF                             |
| 31-50                                               | 77,798 (33.7)    | 78.4/79.0                                    | 0.79 (0.77-0.82)                |
| 51-70                                               | 113,766 (49.3)   | 85.7/86.5                                    | 1.52 (1.47-1.58)                |
| 71+                                                 | 17,653 (7.6)     | 91.8/91.2                                    | 2.52 (2.41-2.64)                |
| <b>Gender</b>                                       |                  |                                              |                                 |
| Female                                              | 159,449 (69.0)   | 80.9/81.0                                    | REF                             |
| Male                                                | 71,530 (31.0)    | 88.8/87.3                                    | 1.70 (1.66-1.74)                |
| <b>Educational attainment</b>                       |                  |                                              |                                 |
| Primary education                                   | 2,870 (1.2)      | 79.8/80.7                                    | 0.46 (0.42-0.51)                |
| Secondary education                                 | 62,423 (27.0)    | 80.2/80.8                                    | 0.59 (0.58-0.61)                |
| Higher education                                    | 158,370 (68.6)   | 84.3/85.0                                    | REF                             |
| PhD                                                 | 7,316 (3.2)      | 90.7/91.3                                    | 1.82 (1.69-1.96)                |
| <b>Physical contact outside household last week</b> |                  |                                              |                                 |
| Yes                                                 | 50,888 (22.0)    | 78.7/79.1                                    | 0.66 (0.64-0.68)                |
| No                                                  | 180,091 (78.0)   | 84.6/85.6                                    | REF                             |

**Table S.3: Association government trust and vaccine willingness.**

|                               | participants (%) | vaccine willingness %<br>unweighted/weighted | vaccine willingness OR (95% CI) |
|-------------------------------|------------------|----------------------------------------------|---------------------------------|
| <b>Participation date</b>     |                  |                                              |                                 |
| August 25                     | 22,750 (53.3)    | 80.7/82.7                                    | REF                             |
| December 15                   | 19,934 (46.7)    | 83.1/83.9                                    | 0.80 (0.76-0.85)                |
| <b>Age</b>                    |                  |                                              |                                 |
| 18-30                         | 3,495 (8.2)      | 80.4/82.1                                    | REF                             |
| 31-50                         | 14,145 (33.1)    | 75.8/77.7                                    | 0.81 (0.75-0.87)                |
| 51-70                         | 21,647 (50.7)    | 84.5/85.9                                    | 1.43 (1.32-1.54)                |
| 71+                           | 3,397 (8.0)      | 91.0/90.2                                    | 1.97 (1.79-2.18)                |
| <b>Gender</b>                 |                  |                                              |                                 |
| Female                        | 29,378 (68.8)    | 79.0/79.7                                    | REF                             |
| Male                          | 13,306 (31.2)    | 88.2/87.0                                    | 2.15 (2.04-2.27)                |
| <b>Educational attainment</b> |                  |                                              |                                 |
| Primary education             | 535 (1.3)        | 77.0/81.1                                    | 0.49 (0.39-0.61)                |
| Secondary education           | 11,730 (27.5)    | 78.5/79.8                                    | 0.67 (0.63-0.71)                |
| Higher education              | 29,040 (68.0)    | 82.9/84.1                                    | REF                             |
| PhD                           | 1,379 (3.2)      | 90.1/91.4                                    | 1.97 (1.67-2.33)                |
| <b>Government trust</b>       |                  |                                              |                                 |
| 7 Trust completely            | 2,529 (5.9)      | 93.8/94.5                                    | REF                             |
| 6                             | 8,038 (18.8)     | 90.8/91.5                                    | 0.67 (0.56-0.80)                |
| 5                             | 8,972 (21.0)     | 87.6/88.8                                    | 0.51 (0.43-0.61)                |
| 4                             | 7,574 (17.7)     | 82.3/84.4                                    | 0.36 (0.30-0.43)                |
| 3                             | 5,457 (12.8)     | 77.9/79.8                                    | 0.25 (0.21-0.30)                |
| 2                             | 4,776 (11.2)     | 73.3/74.5                                    | 0.17 (0.15-0.21)                |
| 1 Do not trust at all         | 4,617 (10.8)     | 62.1/64.5                                    | 0.10 (0.08-0.12)                |
| No opinion                    | 721 (1.7)        | 75.3/78.4                                    | 0.28 (0.22-0.35)                |

**Table S.4: Association mental well-being and vaccine willingness**

|                                        | participants (%) | vaccine willingness %<br>unweighted/weighted | vaccine willingness OR (95% CI) |
|----------------------------------------|------------------|----------------------------------------------|---------------------------------|
| <b>Participation date</b>              |                  |                                              |                                 |
| July 14                                | 24,756 (10.7)    | 89.2/89.9                                    | REF                             |
| July 28                                | 32,219 (13.9)    | 89.3/90.0                                    | 1.05 (0.99-1.12)                |
| August 25                              | 22,788 (9.9)     | 80.7/82.6                                    | 0.53 (0.50-0.56)                |
| September 08                           | 20,490 (8.9)     | 78.1/80.7                                    | 0.46 (0.43-0.48)                |
| September 22                           | 17,722 (7.7)     | 77.7/80.2                                    | 0.45 (0.43-0.47)                |
| November 03                            | 22,953 (9.9)     | 81.8/83.1                                    | 0.56 (0.53-0.60)                |
| November 17                            | 23,902 (10.3)    | 82.1/83.1                                    | 0.57 (0.54-0.60)                |
| December 01                            | 20,813 (9.0)     | 81.0/81.7                                    | 0.51 (0.48-0.54)                |
| December 15                            | 19,953 (8.6)     | 83.1/83.9                                    | 0.60 (0.57-0.64)                |
| December 29                            | 25,383 (11.0)    | 85.1/85.9                                    | 0.69 (0.65-0.73)                |
| <b>Age</b>                             |                  |                                              |                                 |
| 18-30                                  | 21,762 (9.4)     | 81.7/82.4                                    | REF                             |
| 31-50                                  | 77,798 (33.7)    | 78.4/79.0                                    | 0.83 (0.81-0.86)                |
| 51-70                                  | 113,766 (49.3)   | 85.7/86.5                                    | 1.58 (1.52-1.63)                |
| 71+                                    | 17,653 (7.6)     | 91.8/91.2                                    | 2.66 (2.55-2.79)                |
| <b>Gender</b>                          |                  |                                              |                                 |
| Female                                 | 159,449 (69.0)   | 80.9/81.0                                    | REF                             |
| Male                                   | 71,530 (31.0)    | 88.8/87.3                                    | 1.70 (1.66-1.74)                |
| <b>Educational attainment</b>          |                  |                                              |                                 |
| Primary education                      | 2,870 (1.2)      | 79.8/80.7                                    | 0.47 (0.43-0.52)                |
| Secondary education                    | 62,423 (27.0)    | 80.2/80.8                                    | 0.59 (0.58-0.61)                |
| Higher education                       | 158,370 (68.6)   | 84.3/85.0                                    | REF                             |
| PhD                                    | 7,316 (3.2)      | 90.7/91.3                                    | 1.85 (1.71-1.99)                |
| <b>GHQ-12: Mental well-being score</b> |                  |                                              |                                 |
| 0                                      | 112,953 (48.9)   | 85.0/85.7                                    | REF                             |
| 1-4                                    | 59,501 (25.8)    | 83.9/84.6                                    | 0.97 (0.94-1.00)                |
| 5-8                                    | 28,609 (12.4)    | 81.6/82.6                                    | 0.88 (0.85-0.91)                |
| 9-12                                   | 29,916 (13.0)    | 77.5/78.8                                    | 0.70 (0.68-0.73)                |

**Table S.5: Association vaccinate willingness child and vaccination willingness**

|                                  | participants (%) | vaccine willingness %<br>unweighted/weighted | vaccine willingness OR (95% CI) |
|----------------------------------|------------------|----------------------------------------------|---------------------------------|
| <b>Participation date</b>        |                  |                                              |                                 |
| July 14                          | 5,795 (14.7)     | 86.7/87.4                                    | REF                             |
| July 28                          | 8,089 (20.5)     | 87.7/87.3                                    | 0.97 (0.81-1.16)                |
| November 03                      | 5,145 (13.0)     | 76.8/77.9                                    | 0.66 (0.56-0.78)                |
| November 17                      | 5,391 (13.7)     | 76.7/77.5                                    | 0.64 (0.54-0.76)                |
| December 01                      | 4,483 (11.4)     | 74.8/75.9                                    | 0.63 (0.53-0.74)                |
| December 15                      | 4,344 (11.0)     | 77.7/78.9                                    | 0.91 (0.77-1.08)                |
| December 29                      | 6,227 (15.8)     | 80.5/81.2                                    | 0.72 (0.61-0.86)                |
| <b>Age</b>                       |                  |                                              |                                 |
| 18-30                            | 1,353 (3.4)      | 76.7/77.1                                    | REF                             |
| 31-50                            | 33,293 (84.3)    | 80.7/80.8                                    | 0.92 (0.78-1.09)                |
| 51-70                            | 4,744 (12.0)     | 83.5/83.5                                    | 0.86 (0.68-1.07)                |
| 71+                              | 84 (0.2)         | 91.7/92.6                                    | 0.83 (0.37-1.86)                |
| <b>Gender</b>                    |                  |                                              |                                 |
| Female                           | 30,522 (77.3)    | 79.6/78.0                                    | REF                             |
| Male                             | 8,952 (22.7)     | 85.7/84.4                                    | 1.25 (1.15-1.37)                |
| <b>Educational attainment</b>    |                  |                                              |                                 |
| Primary education                | 189 (0.5)        | 68.3/65.6                                    | 0.24 (0.13-0.43)                |
| Secondary education              | 6,927 (17.5)     | 73.2/73.5                                    | 0.54 (0.48-0.60)                |
| Higher education                 | 30,706 (77.8)    | 82.3/82.3                                    | REF                             |
| PhD                              | 1,652 (4.2)      | 89.2/89.0                                    | 1.34 (1.06-1.71)                |
| <b>Vaccine willingness child</b> |                  |                                              |                                 |
| Willing                          | 30,607 (77.5)    | 97.4/97.5                                    | REF                             |
| Not willing                      | 8,867 (22.5)     | 24.1/23.9                                    | 0.01 (0.01-0.01)                |
